# Supplementary material for: The Effects of a Short-Term Isometric Exercise Program Targeting Tongue, Jaw, and Trunk Muscles on Muscle Strength and Synergistic Relationships in Post-Stroke Patients: A Single-Group Pre-Post Study
Source: Research Square preprint supplement (doi:10.21203/rs.3.rs-7751845/v1), 2026-01-13
Supplement: Supplementary file 1 [file 7d2007de684acd05b1be74b6.docx]

**Table 1. Demographic and Clinical Characteristics of Patients**

| **Variable** | **Min.** | **Max.** | **Mean** | **SD** |
| --- | --- | --- | --- | --- |
| **Sociodemographic Data** | |  |  |  |
| Age (years) | 39.00 | 75.00 | 59.08 | 10.15 |
| Stroke Duration (months) | 2.00 | 72.00 | 18.00 | 19.60 |
| **Clinical Assessment** | |  |  |  |
| Brunnstromm Upper Extremity | 1.00 | 6.00 | 3.58 | 1.72 |
| Brunnstromm Hand | 1.00 | 5.00 | 3.41 | 1.44 |
| Brunnstromm Lower Extremity | 3.00 | 5.00 | 4.00 | 0.85 |
| Barthel Index | 0.00 | 75.00 | 36.66 | 21.77 |
| EAT-10 | 0.00 | 26.00 | 11.91 | 10.42 |
| **Muscle Strength Measurements (Pre-Post)** | | | | |
| Anterior Tongue Muscle Strength (Pre) | 12.00 | 47.00 | 25.91 | 11.71 |
| Anterior Tongue Muscle Strength (Post) | 10.00 | 56.00 | 30.41 | 14.33 |
| Posterior Tongue Muscle Strength (Pre) | 10.00 | 28.00 | 19.33 | 6.66 |
| Posterior Tongue Muscle Strength (Post) | 12.00 | 36.00 | 23.08 | 7.45 |
| Jaw Muscle Strength (Pre) | 3.40 | 12.00 | 5.94 | 2.19 |
| Jaw Muscle Strength (Post) | 4.20 | 7.20 | 5.65 | 0.94 |
| Back Muscle Strength (Pre) | 42.00 | 84.00 | 49.75 | 11.33 |
| Back Muscle Strength (Post) | 46.00 | 88.00 | 56.66 | 11.57 |

SD: Standard Deviation.

**Table 2. Comparison of Muscle Strength Differences Before and After Treatment (Wilcoxon Test)**

|  | **Pre-Treatment –**  **Post-Treatment** | **Z** | **p** |
| --- | --- | --- | --- |
| **Anterior Tongue Muscle Strength** | -4.50 | −2.242 | 0.025* |
| **Posterior Tongue Muscle Strength (2-tailed)** | -3.75 | −2.316 | 0.021* |
| **Jaw Muscle Strength** | 0.29 | −0.714 | 0.475 |
| **Back Muscle Strength** | -6.91 | −2.831 | 0.005* |

The Z value is the test statistic from the Wilcoxon signed-rank test. p<0.05 indicates a statistically significant difference.

**Table 3. Pre-Treatment Correlation Between Tongue, Jaw and Back Muscle Strength**

| **Variable** | **Anterior Tongue Muscle Strength** | **Posterior Tongue Muscle Strength** |
| --- | --- | --- |
| **Jaw Muscle Strength** | r=0.244(p=0.445) | r=0.233(p=0.466) |
|  |  |  |
| **Back Muscle Strength** | r=0.059(p=0.856) | r=−0.028(p=0.930) |
|  |  |  |

Results from Spearman's correlation analysis. Values in parentheses represent two-tailed p-values.

**Table 4.** Post-Treatment Correlation Between Tongue, Jaw, and Back Muscle Strength

| **Variable** | **Anterior Tongue Muscle Strength** | **Posterior Tongue Muscle Strength** |
| --- | --- | --- |
| **Jaw Muscle Strength** | r=0.228 (p=0.476) | r=0.336 (p=0.285) |
|  |  |  |
| **Back Muscle Strength** | r=−0.067 (p=0.836) | r=0.143 (p=0.658) |
|  |  |  |

Results from Spearman's correlation analysis. Values in parentheses represent two-tailed p-values.

**Table 5. Post-Treatment Partial Correlation Analysis** **(Influence of Jaw and Back Muscle Strength on the Relationship Between Tongue Muscles)**

| **Variable** | **Control Variable** | **r** | **P** |
| --- | --- | --- | --- |
| Anterior Tongue Muscle Strength | Jaw Muscle Strength | 0.626 | 0.040* |
| Posterior Tongue Muscle Strength | Back Muscle Strength | 0.629 | 0.038* |

p<0.05. The table shows how the relationship between anterior and posterior tongue muscle strength changes when jaw and back muscle strength are controlled.
